# Supplementary material for: Synthesis and characterization of magnetite coated by maltodextrin for application in magnetic hyperthermia
Source: Royal Society of Chemistry journal article supplement (doi:10.1039/d4nj01034e), 2024-01-01

S1: XRD of  $\text{Fe}_3\text{O}_4$ @maltodextrin nanoparticles refined by the Rietveld method.

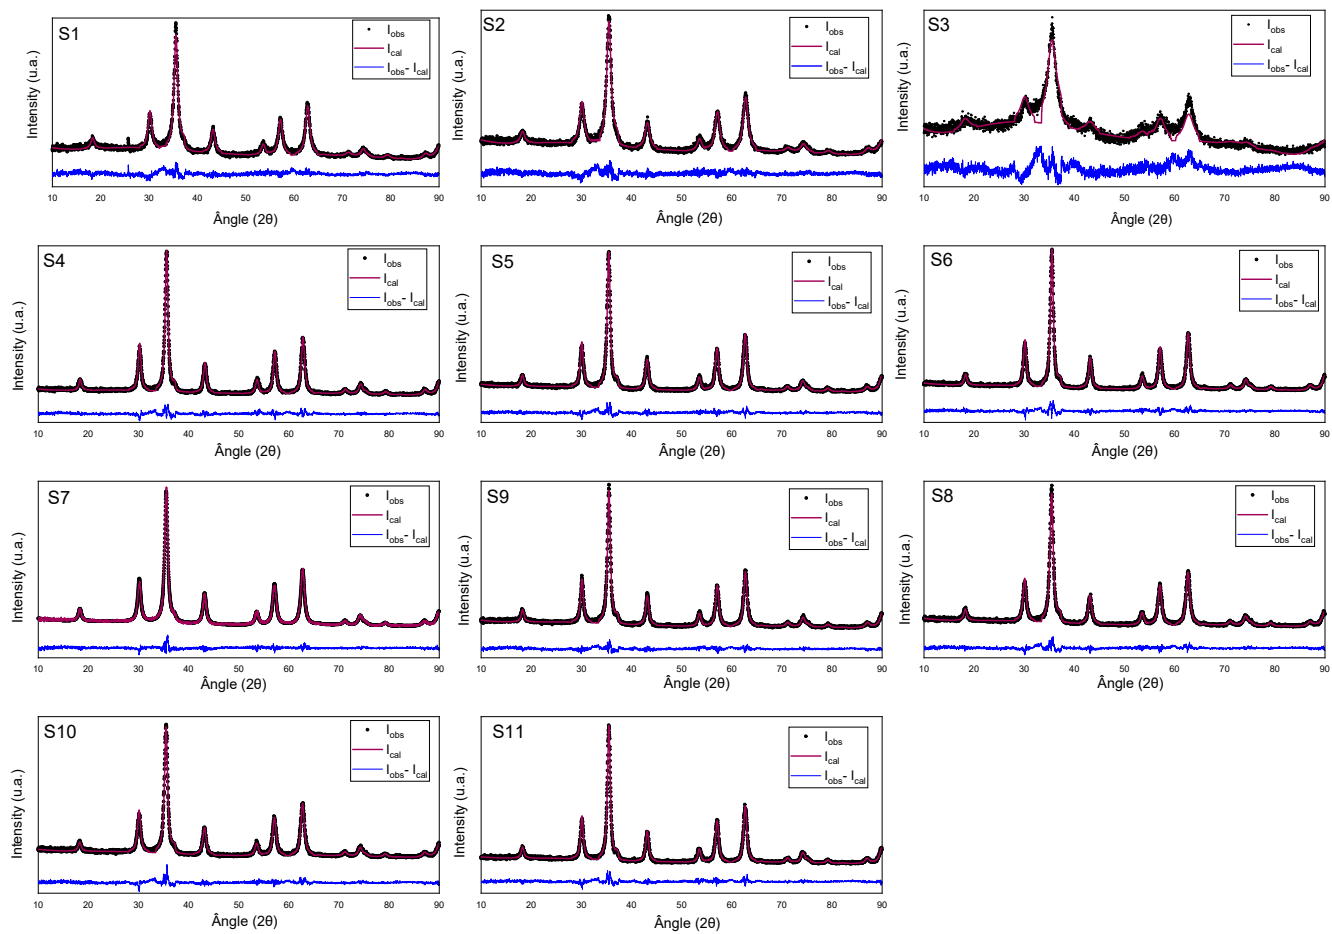

S2: Scanning electron microscopy (SEM) images of Fe<sub>3</sub>O<sub>4</sub>@maltodextrin nanoparticles and magnetite.

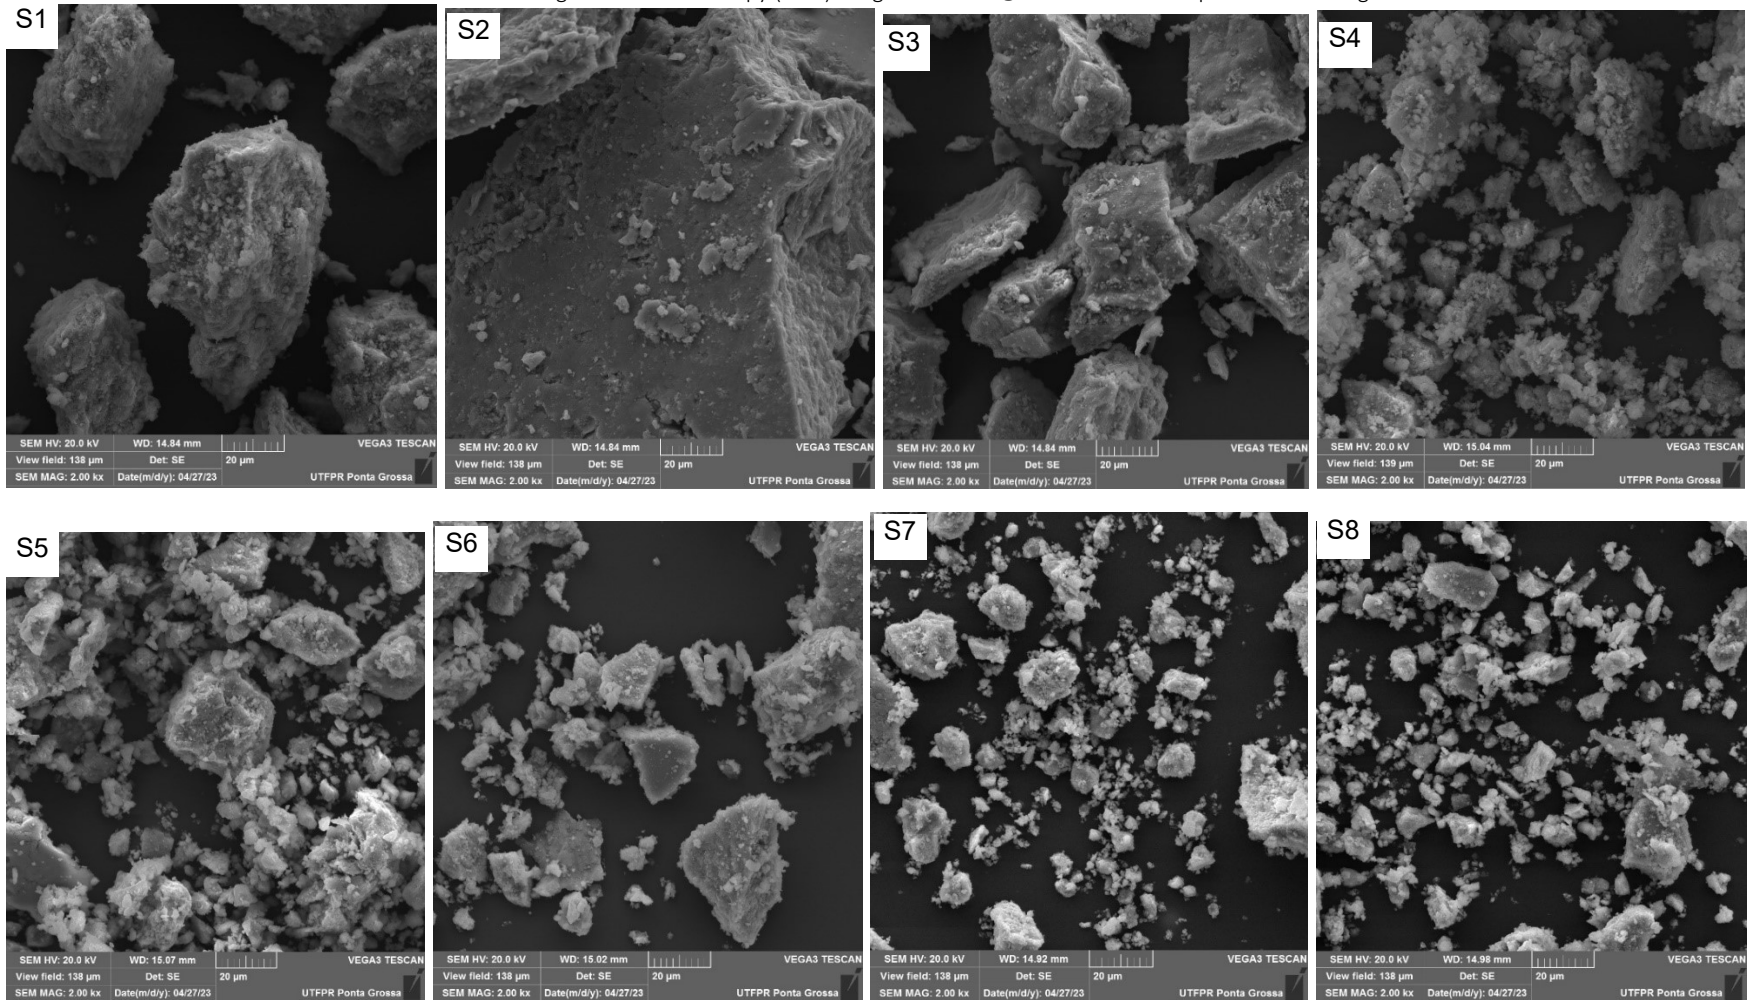

S9

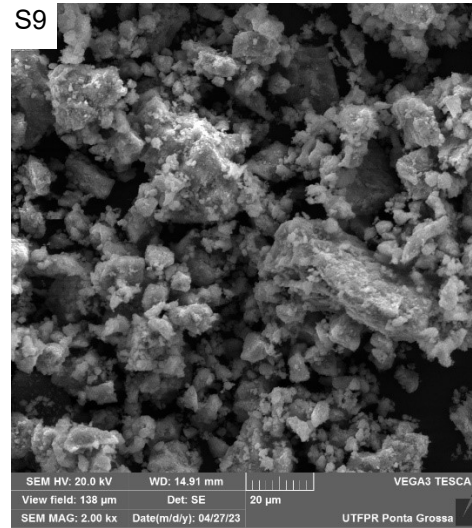

S10

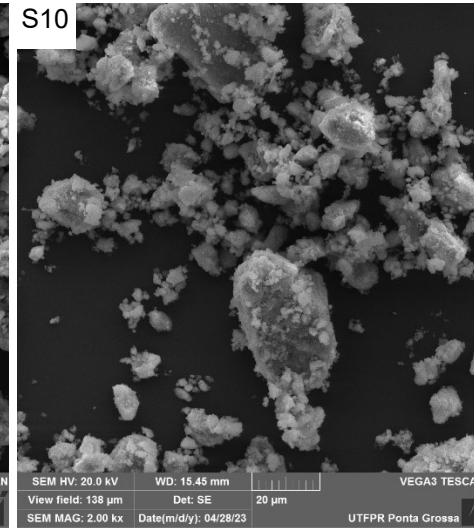

S11

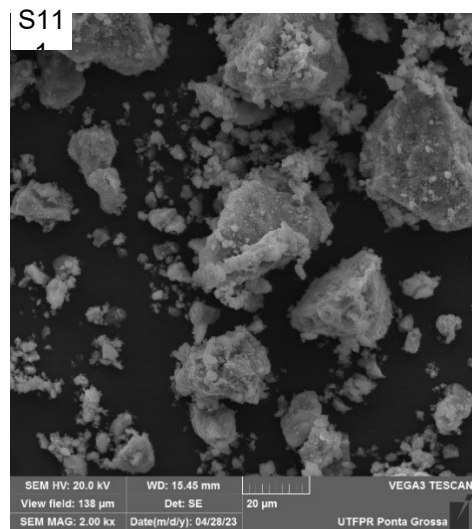

Fe<sub>3</sub>O<sub>4</sub>

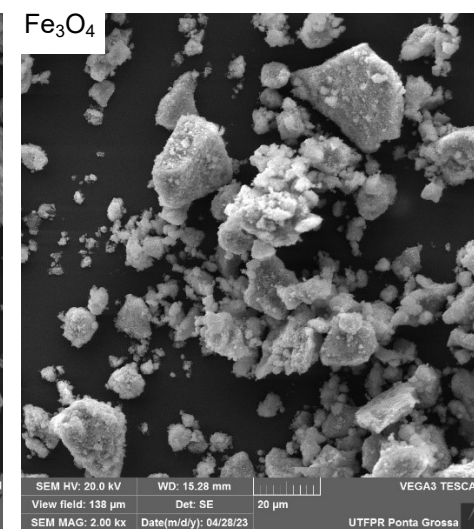

S3: SEM/EDS analysis images: (A) SEM of the sample with nominal magnification of 2kx; (B) Fe map and (C) O map, obtained via EDS from Fe<sub>3</sub>O<sub>4</sub>@maltodextrin nanoparticles

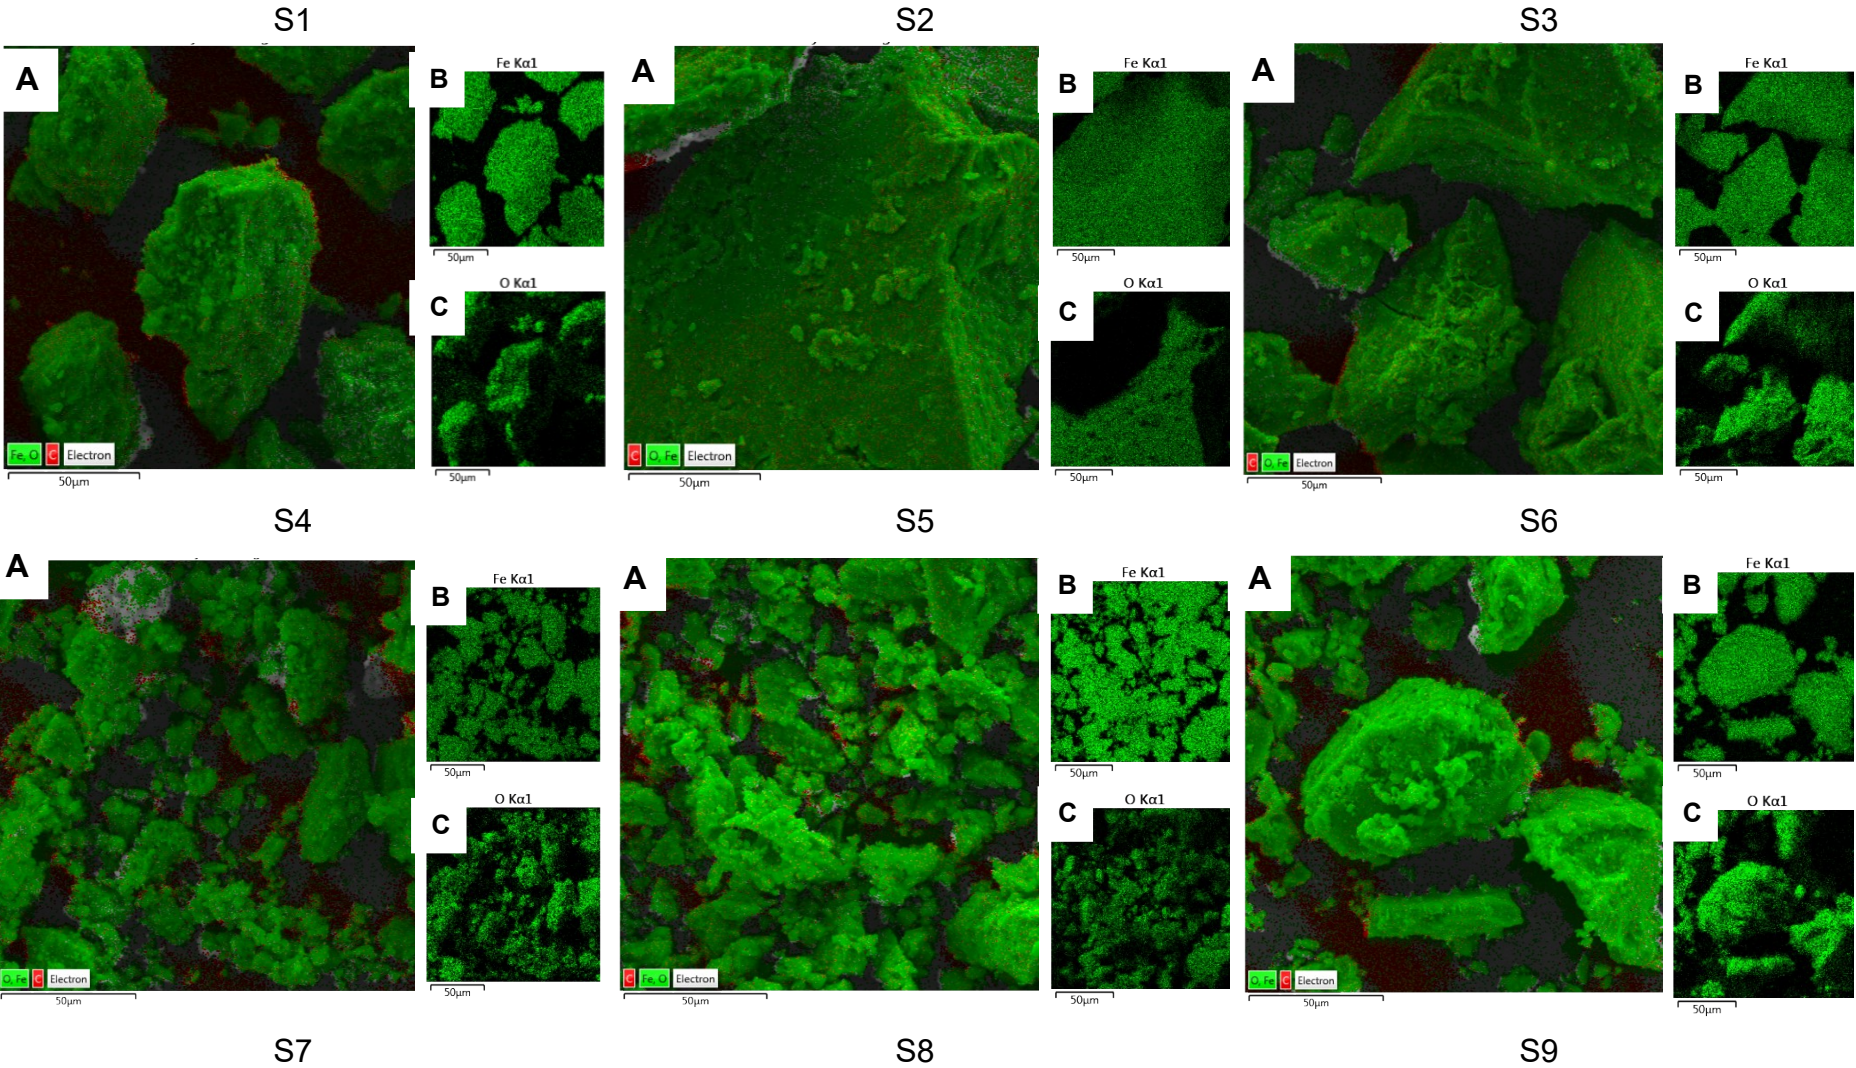



S4: Size distribution of Fe<sub>3</sub>O<sub>4</sub>@maltodextrin nanoparticles in water, in triplicate.

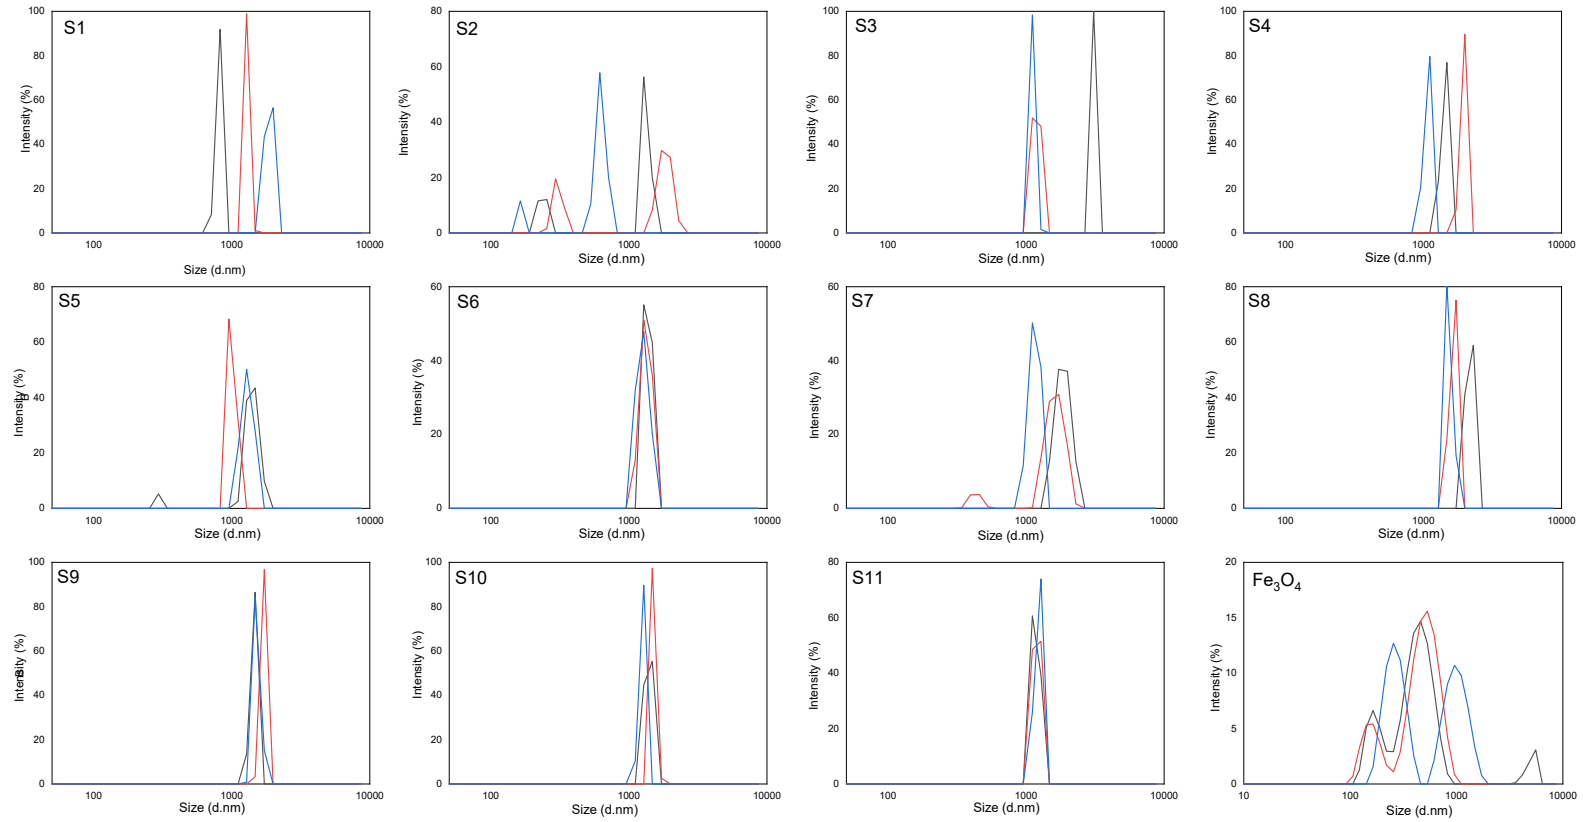

S5: Magnetization curves of Fe<sub>3</sub>O<sub>4</sub>@maltodextrin and magnetite nanoparticles under the action of external magnetic fields close to zero

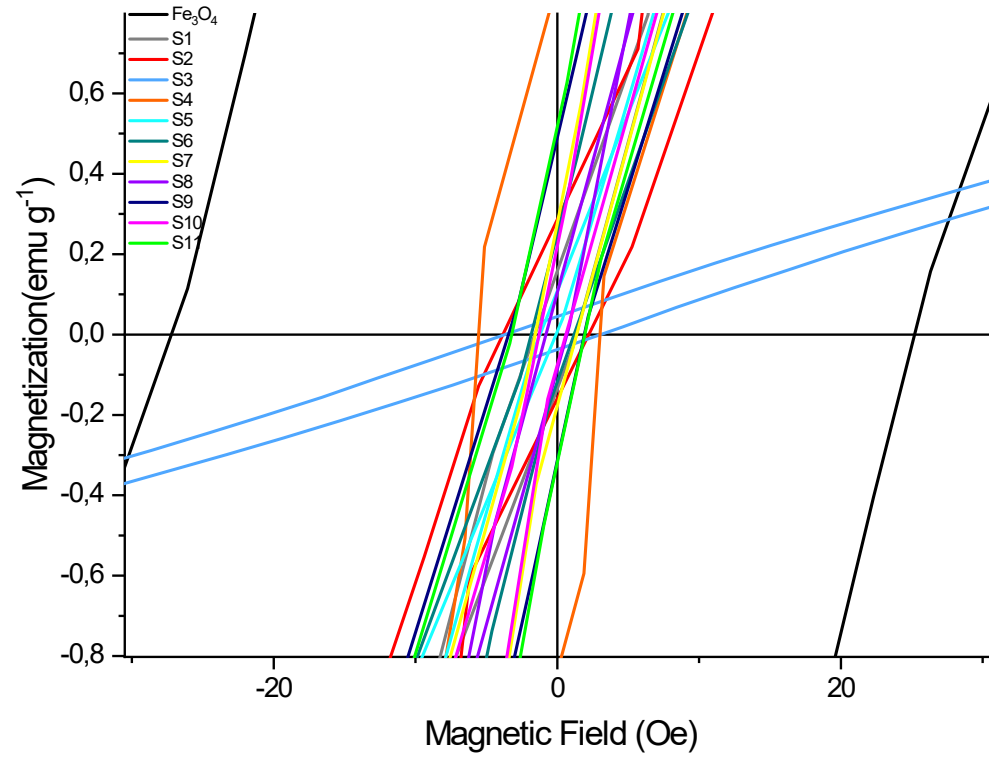

Supplement: d4nj01034e1.pdf [file d4nj01034e1.pdf]
